# Supplementary material for: Enzymatic halogenation of the phenolic monoterpenes thymol and carvacrol with chloroperoxidase
Source: Royal Society of Chemistry journal article supplement (doi:10.1039/c3gc42269k), 2013-11-28

## Supplementary Information

### Electrochemical setup

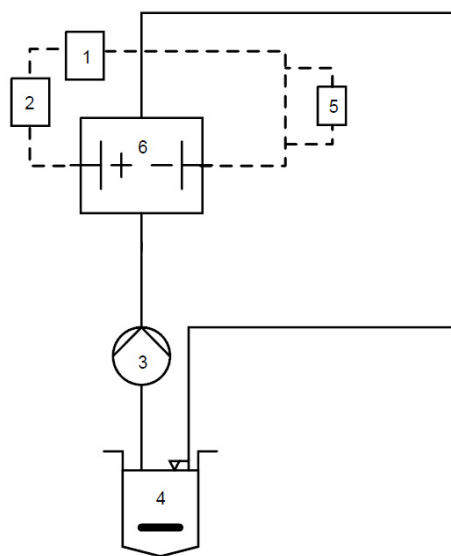

The electrochemical setup consisted of a storage vessel (4) from which the reaction solution was pumped with a peristaltic pump (3) through the electrochemical reaction cell (6) in a circular flow. A current was applied using a current generator (2) to enable hydrogen peroxide production catalyzed by a gas diffusion electrode (GDE). Current and voltage were measured with a series-connected digital ampere meter (1) and a parallel-connected voltmeter (5), respectively.

1: Digital ampere meter, 2: Current source, 3: Peristaltic pump, 4: Storage vessel, 5: Digital voltmeter, 6: Electrochemical reaction cell

### Electrochemical hydrogen peroxide formation

Specific electrochemical  $\text{H}_2\text{O}_2$  formation using our electrochemical setup with a GDE ( $A = 5.5 \text{ cm}^2$ ). The untreated GDE produced  $\text{H}_2\text{O}_2$  in linear fashion in a range from 5 to 20 mA ( $y = 0.025 \cdot x$ ,  $R^2 = 0.96$ ) up to  $0.53 \mu\text{mol min}^{-1} \text{cm}^{-2}$ . The saturated GDE produced  $\text{H}_2\text{O}_2$  in linear fashion in a range of 5 mA to 60 mA ( $y = 0.011 \cdot x$ ,  $R^2 = 0.94$ ) up to  $0.7 \mu\text{mol min}^{-1} \text{cm}^{-2}$ .

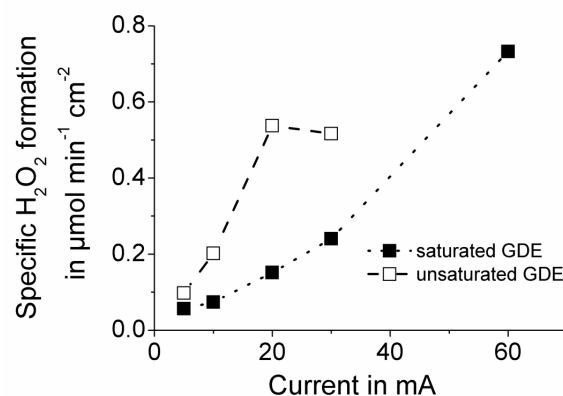

### Kinetics of electroenzymatic thymol conversion

Kinetics of electroenzymatic chlorothymol formation in our electrochemical reactor system varying the applied current. The experiments were performed with a thymol-saturated electrode in 0.1 M citrate buffer (pH 3.5) with 10 nM CPO, a substrate concentration of 2.5 mM thymol, 50 mM NaCl and a continuous electrochemical  $\text{H}_2\text{O}_2$  production at a temperature of  $30 \text{ }^\circ\text{C}$ . Highest productivities were observed at an applied current of 45 mA.

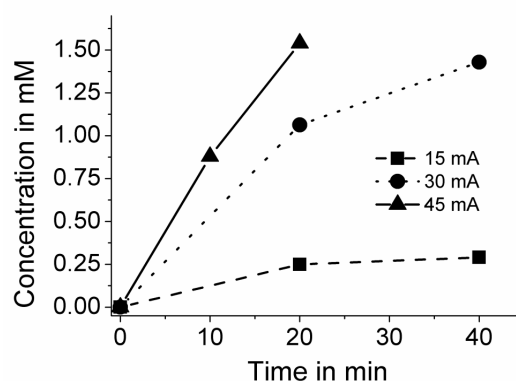

Supplement: c3gc42269k.pdf [file c3gc42269k.pdf]
